# Supplementary material for: Changes in metal mobility associated with bark beetle-induced tree mortality
Source: Royal Society of Chemistry journal article supplement (doi:10.1039/c3em00632h), 2014-01-01
Supplement: c3em00632h1.pdf [file c3em00632h1.pdf]

**Supplementary Tables and Figures for Mikkelsen et al. (2013)**  
**Environmental Science: Processes and Impacts**

**Table S1:** Metal species predicted in column effluents from NICA-donnan model. Ranges encompass the max and min percentage of that species (of the total metal concentration in effluent samples) modeled during the entire experimental duration.

| <b>Metal</b> | <b>Species</b>                   | <b>Control</b> | <b>PNT</b> |
|--------------|----------------------------------|----------------|------------|
| <b>Cu</b>    | Cu <sup>2+</sup>                 | 0              | 0          |
|              | CuDOM                            | 100            | 100        |
| <b>Zn</b>    | Zn <sup>2+</sup>                 | 7.8 - 72.8     | 0          |
|              | ZnOH <sup>+</sup>                | 0.1 - 4.2      | 0          |
|              | ZnDOM                            | 25.0 - 92.0    | 100        |
| <b>Al</b>    | Al(OH) <sub>2</sub> <sup>+</sup> | 0.1 - 4.6      | 0          |
|              | Al(OH) <sub>3</sub>              | 2.6 - 10.7     | 0          |
|              | Al(OH) <sub>4</sub> <sup>-</sup> | 31.1 - 88.6    | 0 - 0.1    |
|              | AlDOM                            | 8.7 - 53.7     | 99.9 - 100 |

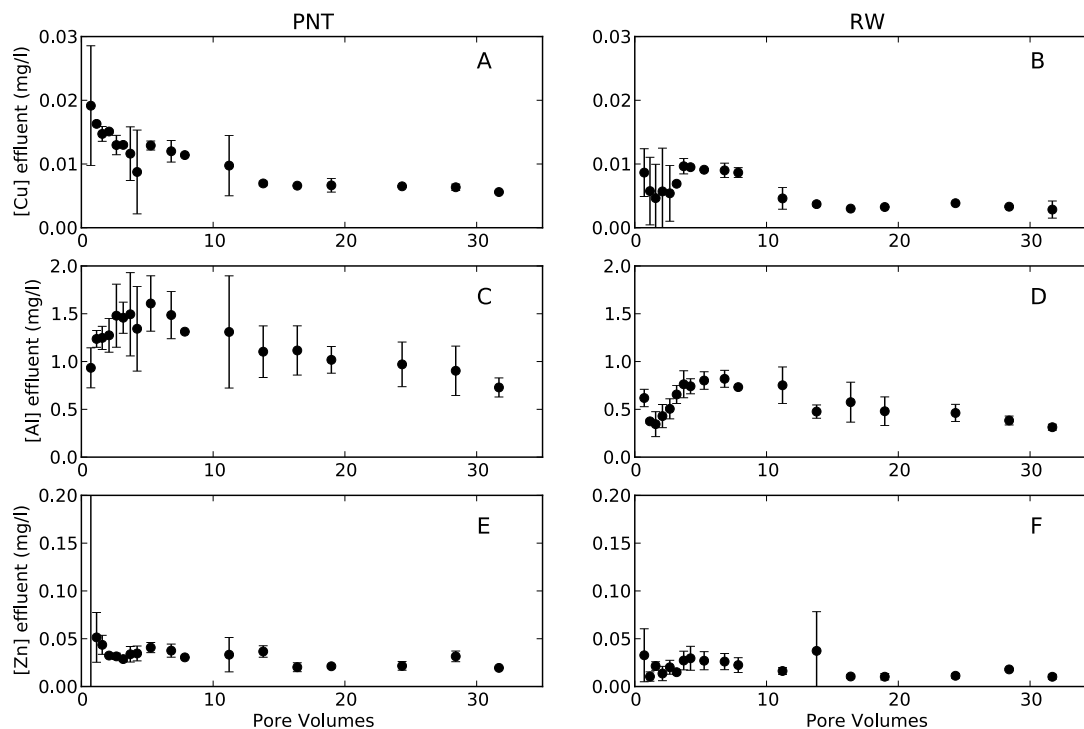

**Figure S1:** Average metal concentrations and associated error bars from duplicate column experiments.

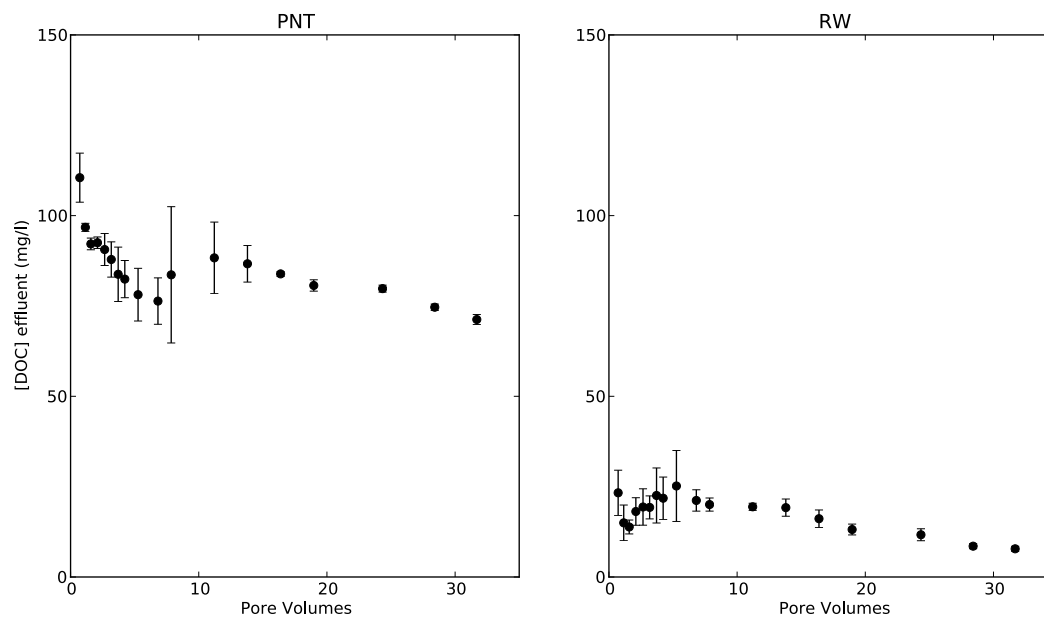

**Figure S2:** Average DOC concentrations and associated error bars from duplicate column experiments.

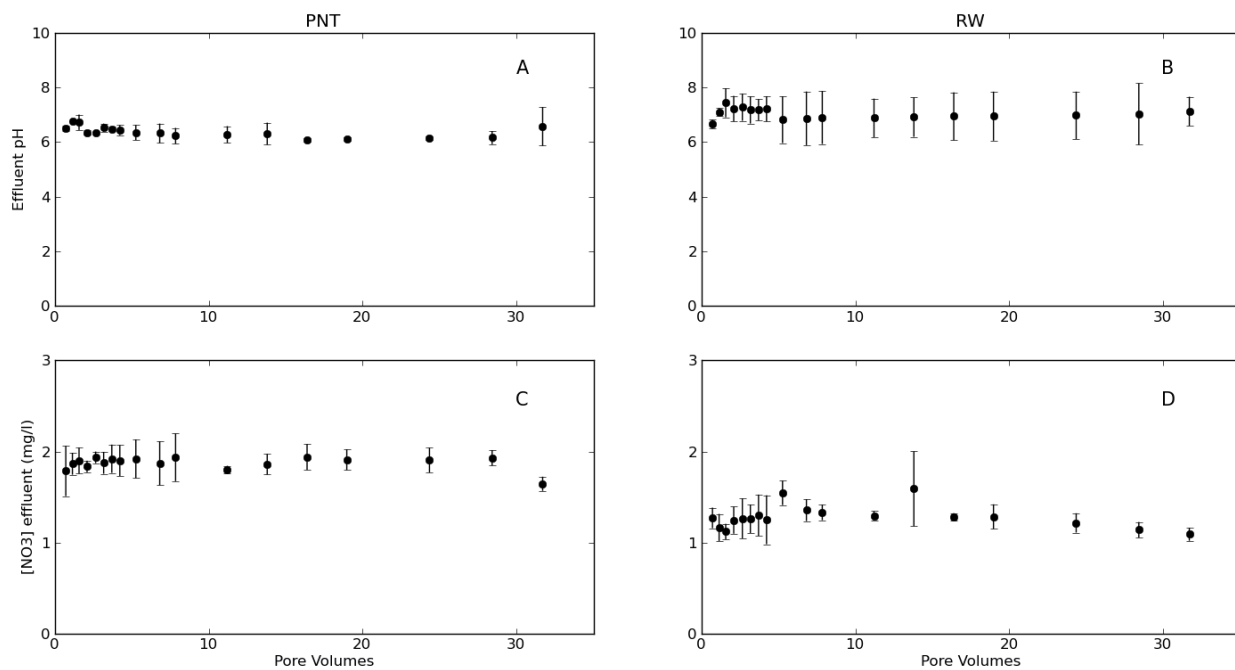

**Figure S3:** Effluent pH and NO<sub>3</sub> values throughout the experimental duration in the PNT (A, C respectively) and RW (B, D respectively) columns.
